# Supplementary material for: Adsorption and corrosion inhibition effect of Schiff base molecules on the mild steel surface in 1 M HCl medium: a combined experimental and theoretical approach
Source: Royal Society of Chemistry journal article supplement (doi:10.1039/c4cp05614k), 2015-01-01
Supplement: c4cp05614k1.pdf [file c4cp05614k1.pdf]

## **:Supplementary File:**

**Adsorption and corrosion inhibition effect of Schiff base molecules on the mild steel surface in 1 M HCl medium: A combined experimental and theoretical approach**

Sourav Kr. Saha,<sup>ab</sup> Alok Dutta,<sup>c</sup> Pritam Ghosh,<sup>a</sup> Dipankar Sukul<sup>c</sup> and Priyabrata Banerjee<sup>ab\*</sup>

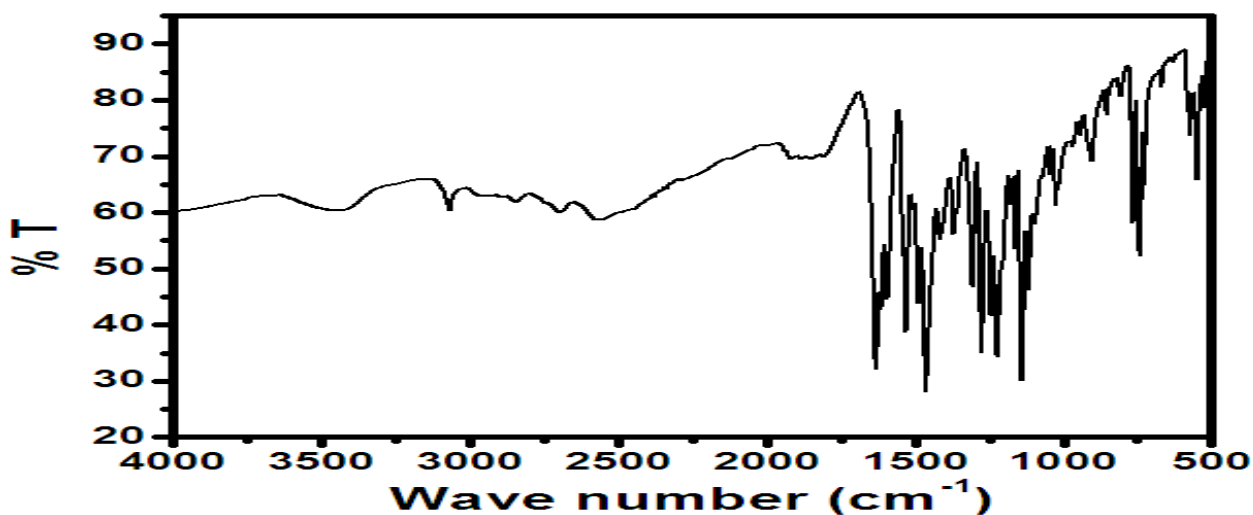

Fig. S1 FTIR spectrum of L<sup>1</sup>.

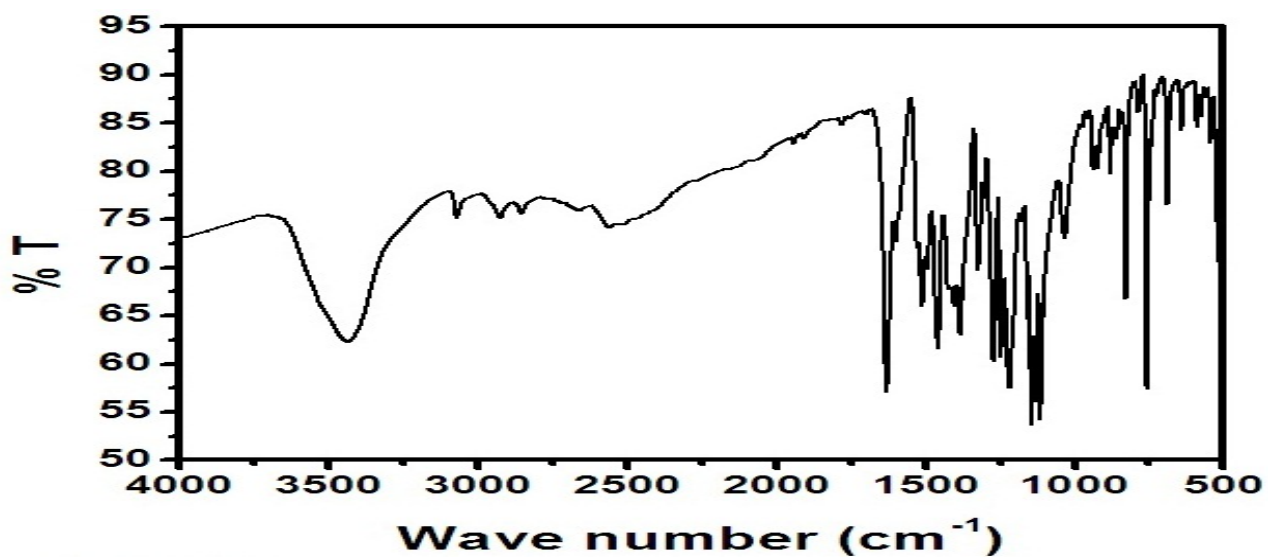

Fig. S2 FTIR spectrum of L<sup>2</sup>.

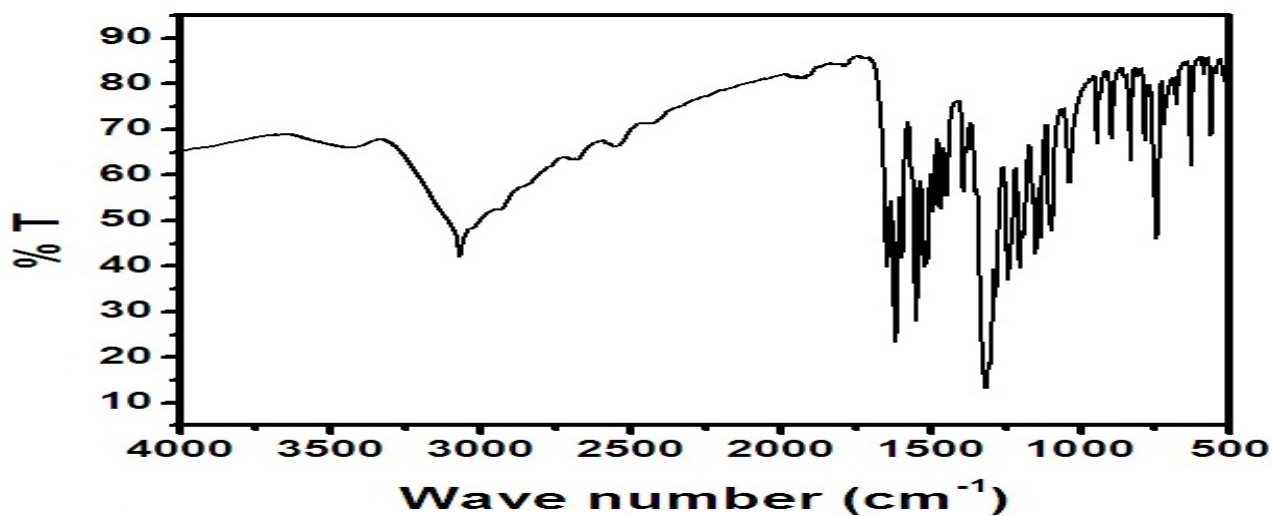

Fig. S3 FTIR spectrum of L<sup>3</sup>.

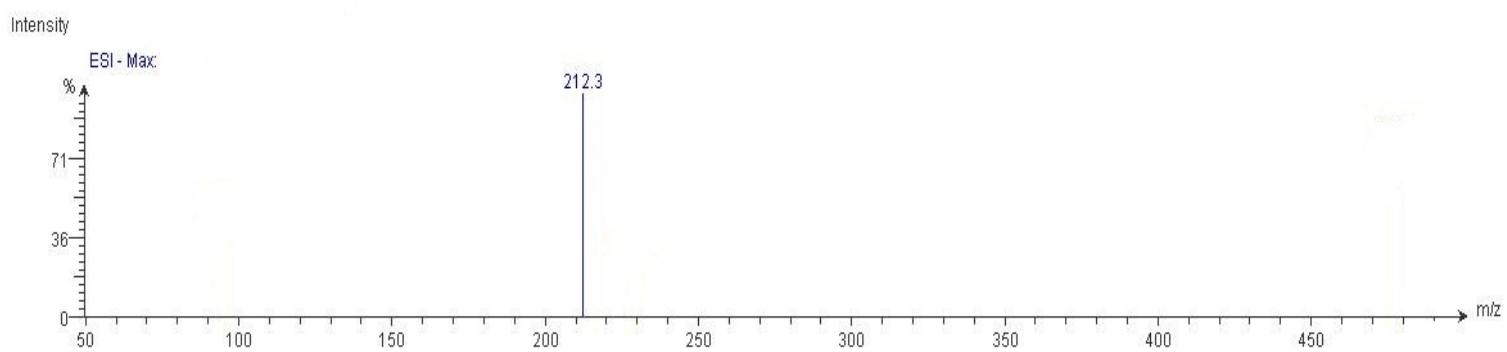

**Fig. S4** ESI-MS spectrum of  $L^1$  in methanol.

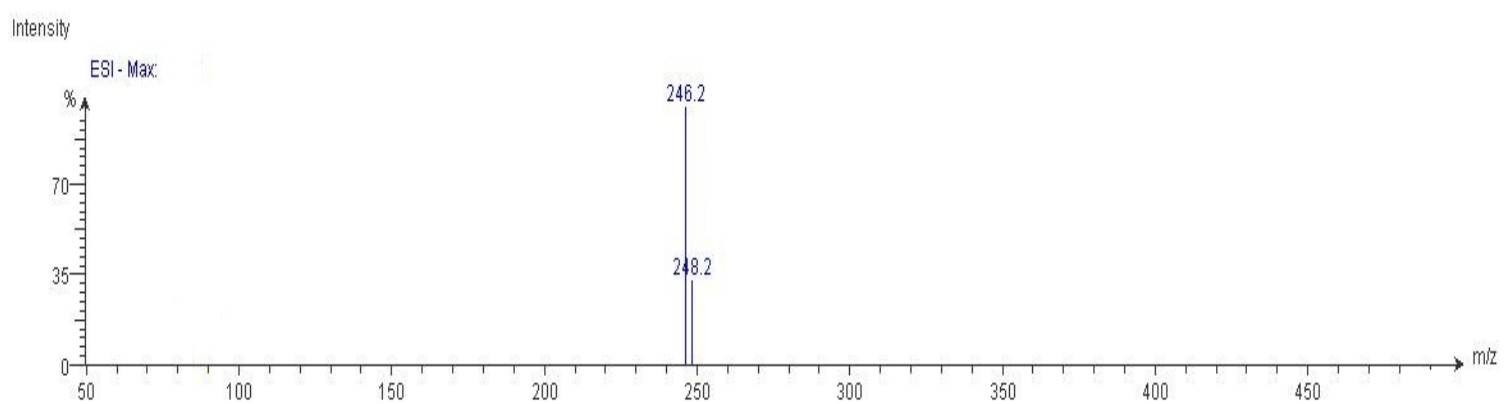

**Fig. S5** ESI-MS spectrum of  $L^2$  in methanol.

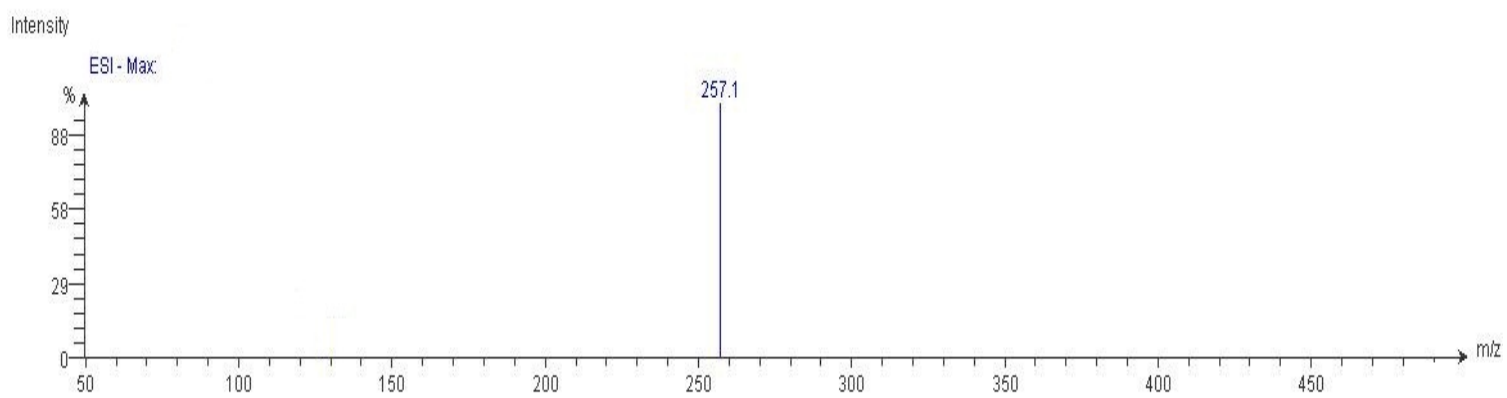

**Fig. S6** ESI-MS spectrum of  $L^3$  in methanol.

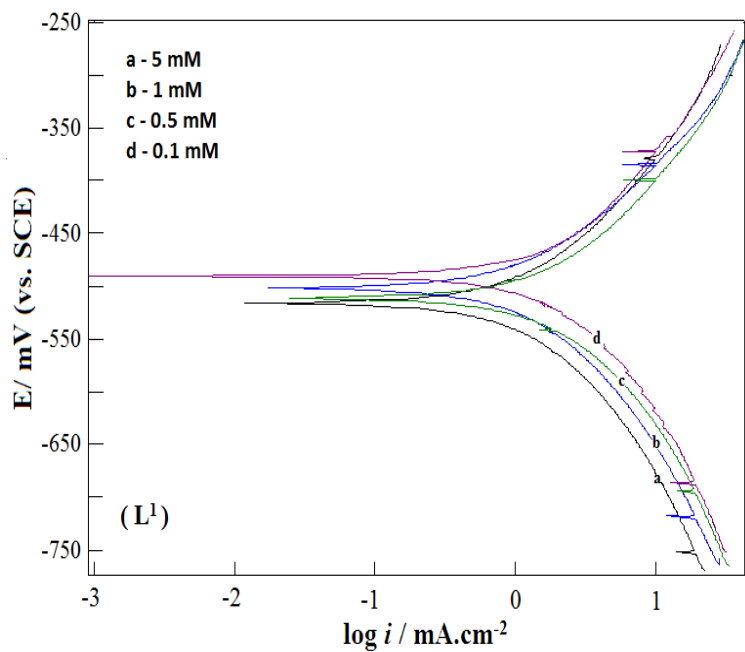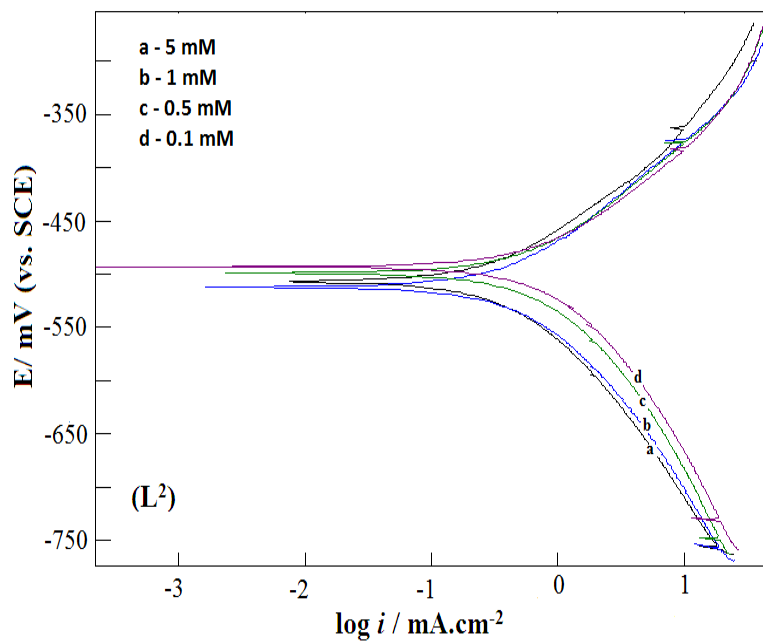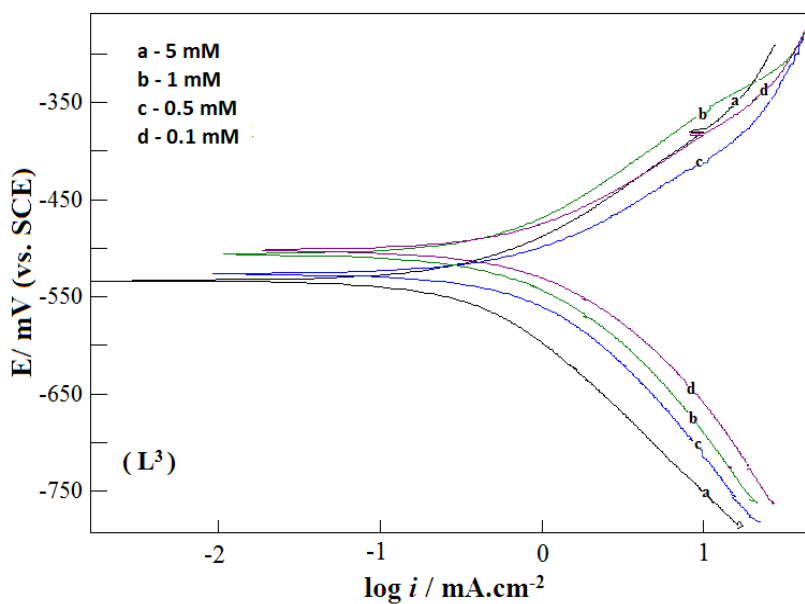

**Fig. S7** Potentiodynamics polarization curves of mild steel in 1 M HCl solution in the presence of different concentration of Schiff bases at 27°C.

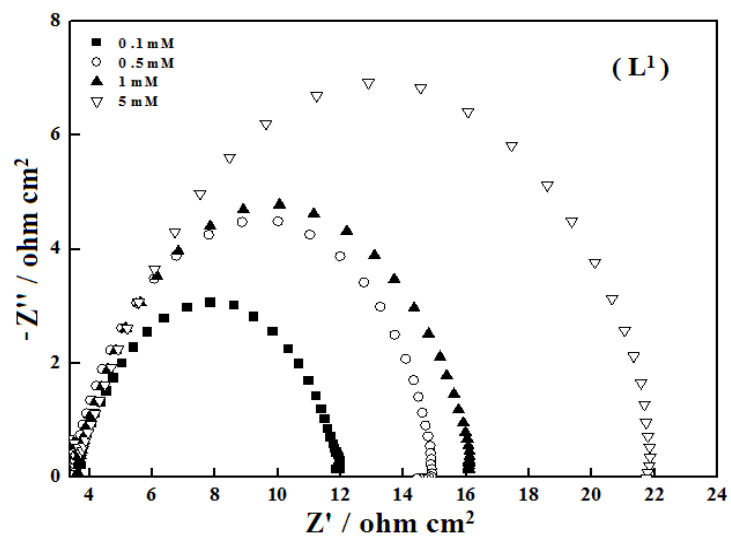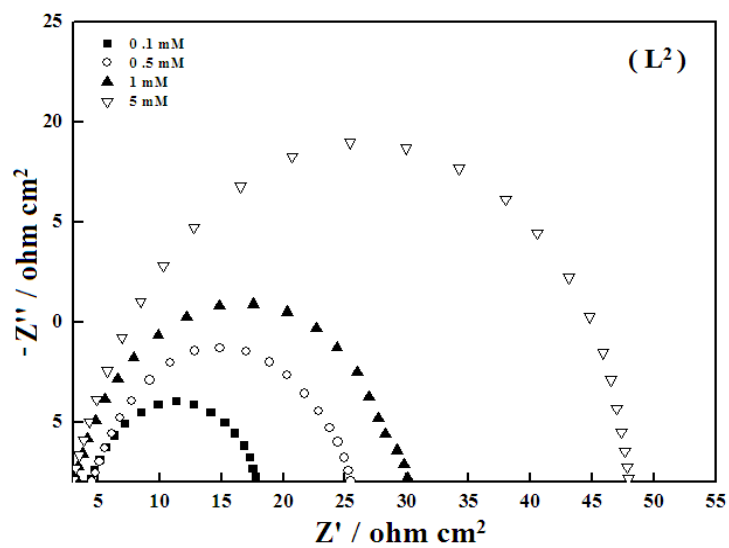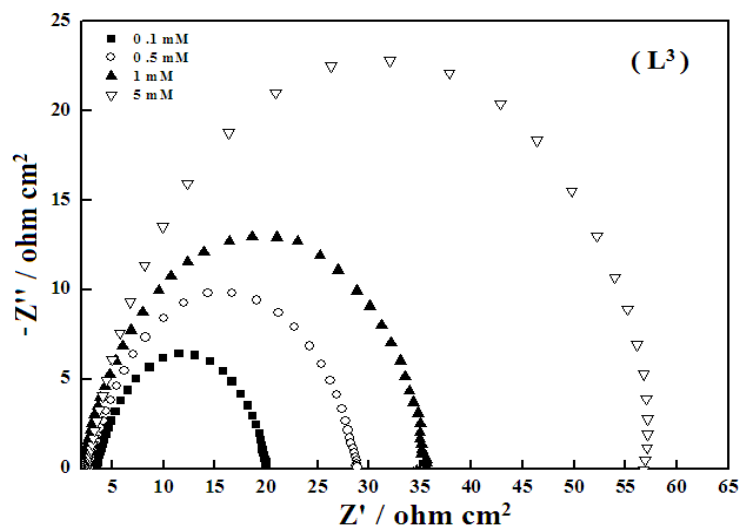

Fig. S8 Nyquist plots of mild steel in 1 M HCl containing different concentration of Schiff bases (L<sup>1</sup>, L<sup>2</sup> and L<sup>3</sup>).

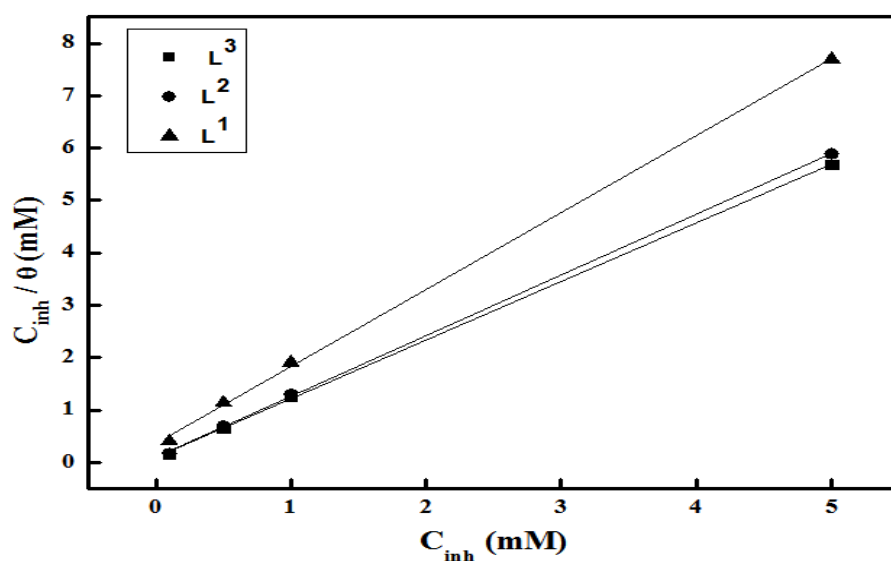

**Fig. S9** Langmuir adsorption plots for mild steel in acidic media containing different concentration of Schiff bases.

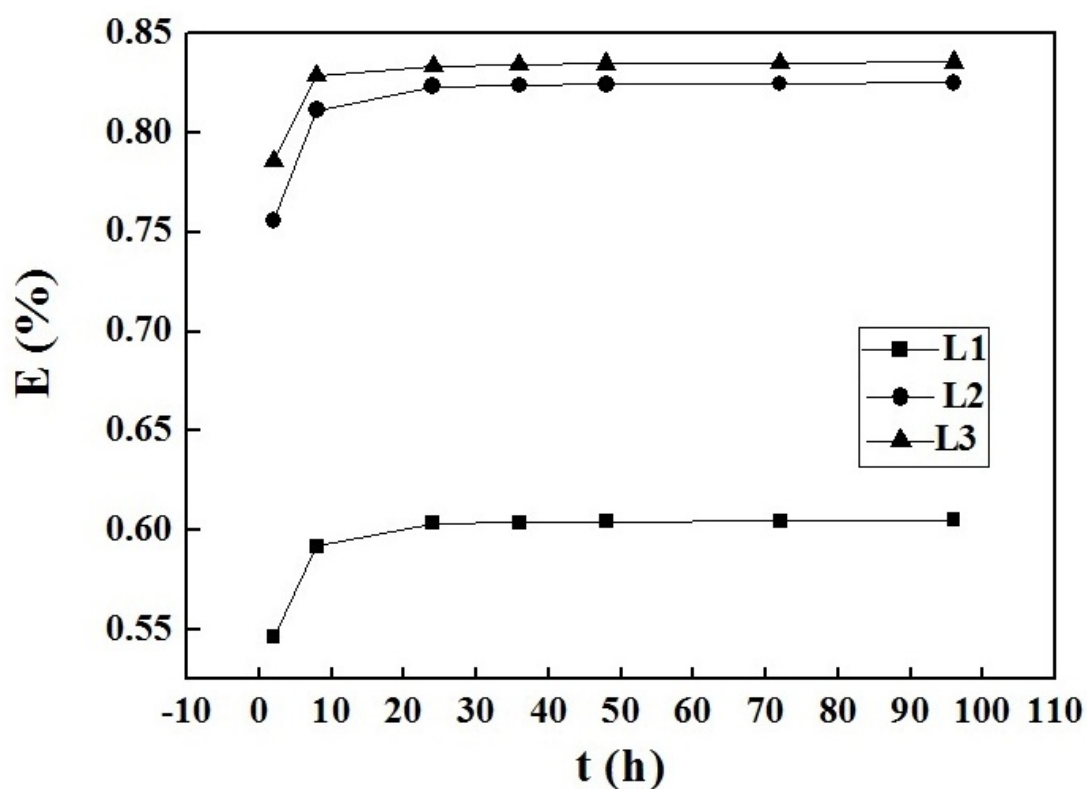

**Fig. S10** Variation of inhibition efficiency obtained from weight loss measurement at 5 mM concentration of three Schiff bases having different immersion time (1-96 hr) towards corrosion of mild steel in 1M HCl.

**Table S1** Calculated Fukui functions for the three inhibitor molecules

| Atoms   | L <sup>1</sup> |         |         | L <sup>2</sup> |         |         | L <sup>3</sup> |         |         |
|---------|----------------|---------|---------|----------------|---------|---------|----------------|---------|---------|
|         | $f_k^+$        | $f_k^-$ | $f_k^0$ | $f_k^+$        | $f_k^-$ | $f_k^0$ | $f_k^+$        | $f_k^-$ | $f_k^0$ |
| O (1)   | 0.047          | 0.055   | 0.051   | 0.046          | 0.058   | 0.052   | 0.051          | 0.027   | 0.039   |
| C (2)   | 0.046          | 0.038   | 0.042   | 0.045          | 0.041   | 0.043   | 0.052          | 0.019   | 0.036   |
| C (3)   | 0.028          | 0.064   | 0.046   | 0.029          | 0.059   | 0.044   | 0.009          | 0.078   | 0.044   |
| C (4)   | 0.021          | 0.061   | 0.041   | 0.021          | 0.056   | 0.039   | 0.006          | 0.073   | 0.040   |
| N (5)   | 0.085          | 0.038   | 0.062   | 0.084          | 0.035   | 0.060   | 0.020          | 0.028   | 0.024   |
| C (6)   | 0.120          | 0.040   | 0.080   | 0.115          | 0.038   | 0.077   | 0.013          | 0.047   | 0.030   |
| C (7)   | 0.036          | 0.035   | 0.036   | 0.037          | 0.033   | 0.035   | 0.029          | 0.018   | 0.024   |
| C (8)   | 0.041          | 0.028   | 0.035   | 0.042          | 0.031   | 0.037   | 0.037          | 0.015   | 0.026   |
| C (9)   | 0.073          | 0.039   | 0.056   | 0.072          | 0.038   | 0.055   | 0.048          | 0.023   | 0.036   |
| C (10)  | 0.038          | 0.043   | 0.041   | 0.029          | 0.036   | 0.033   | 0.032          | 0.016   | 0.024   |
| C (11)  | 0.056          | 0.027   | 0.042   | 0.054          | 0.026   | 0.040   | 0.052          | 0.023   | 0.038   |
| C (12)  | 0.037          | 0.036   | 0.037   | 0.037          | 0.033   | 0.036   | 0.008          | 0.041   | 0.025   |
| C (13)  | 0.025          | 0.071   | 0.048   | 0.025          | 0.066   | 0.046   | 0.008          | 0.093   | 0.051   |
| C (14)  | 0.045          | 0.062   | 0.054   | 0.045          | 0.056   | 0.051   | 0.011          | 0.066   | 0.039   |
| C (15)  | 0.027          | 0.042   | 0.035   | 0.026          | 0.039   | 0.033   | 0.007          | 0.054   | 0.031   |
| O (16)  | 0.026          | 0.084   | 0.055   | 0.026          | 0.078   | 0.052   | 0.010          | 0.109   | 0.060   |
| Cl (17) | —              | —       | —       | 0.045          | 0.066   | 0.056   | —              | —       | —       |
| N (17)  | —              | —       | —       | —              | —       | —       | 0.125          | 0.010   | 0.068   |
| O (18)  | —              | —       | —       | —              | —       | —       | 0.180          | 0.020   | 0.100   |
| O (19)  | —              | —       | —       | —              | —       | —       | 0.181          | 0.022   | 0.102   |
